# Supplementary material
Source: Research Square preprint supplement (doi:10.21203/rs.3.rs-10383062/v1)
Supplement: Supplementary file 1 [file 857aa023a764ed5dd500c273.docx]

**Supplementary Material**

Spatial diffusion and climatic suitability shape the West Nile Virus invasion risk across Europe

Zia Farooq*a , Jan C. Semenzaa,b

1. Department of Epidemiology and Global Health, Umeå University, Umeå, 907 87, Sweden
2. Heidelberg Institute of Global Health, University of Heidelberg, Heidelberg 69120, Germany

***Corresponding author**

Zia Farooq, PhD

23, Målpunkt F52, Elsa Bolins Gränd 6,

5tr, Norrlands universitetssjukhus,

Epidemiologi och global hälsa,

Umeå Universitet, 90185 Umeå, Sweden

Email: [zia.farooq@umu.se](mailto:zia.farooq@umu.se)

## Supplementary Methods

**S1. Diagnostic investigation of the proportional-hazards assumption and structural sensitivity of the invasion-pressure metric**

**Proportional-hazards assessment.**

The proportional-hazards assumption was evaluated for all covariates in the primary multivariable Cox model using scaled Schoenfeld residuals. A global departure from proportionality was identified (χ² = 25.77, df = 8, p = 0.001), with individual-covariate tests indicating non-proportionality for geographic distance (χ² = 4.35, p = 0.037), neighbourhood invasion pressure (χ² = 5.69, p = 0.017), precipitation (χ² = 6.11, p = 0.013), and Urbanization category (χ² = 6.28, df = 2, p = 0.043). Temperature and relative humidity, the covariates underlying the primary eco-climatic diffusion interaction, showed no evidence of non-proportionality (p = 0.667 and p = 0.231, respectively). Scaled Schoenfeld residual plots for geographic distance and neighbourhood invasion pressure are shown in Supplementary Figure S4, and the full test is reported in Supplementary Table S6-S10.

**Time-varying coefficient analysis.**

Because geographic distance and neighbourhood invasion pressure are the principal spatial-diffusion metrics and the dominant predictors of invasion risk, their time-dependent behaviour was characterised using a time-varying coefficient extension of the Cox model, in which each metric was interacted with a logarithmic function of follow-up time . Under this specification, neither metric exhibited a statistically significant time-varying coefficient: the interaction with log follow-up time was non-significant for invasion pressure (HR 0.88, 95% CI 0.71–1.09, p = 0.231) and for geographic distance (HR 1.18, 95% CI 0.98–1.42, p = 0.080). The point estimates are directionally consistent with a weakening of the pressure effect and an attenuation of the distance penalty over follow-up, but the evidence for a defined temporal trend of this form is weak, indicating that the departure detected by the Schoenfeld test is modest and not well described by a smooth logarithmic time trend. Both metrics remained strongly associated with invasion hazard throughout the observation period, with study-entry hazard ratios of 0.41 (95% CI 0.27–0.62) for distance and 1.88 (95% CI 1.02–3.43) for pressure (concordance = 0.878; Supplementary Table S7). These study-entry values are the conditional effects at t = 0 under the time-varying parameterisation and are therefore distinct from the period-averaged estimates of the primary model (distance 0.56 and pressure 1.26 per standard deviation, on average across the study period).

**Structural investigation of the invasion-pressure distance-decay kernel.**

We next examined whether the modest departure from proportional hazard was attributable to an assumption embedded in the unweighted invasion-pressure kernel, namely that all previously invaded regions contribute equally to a focal region’s exposure per unit of distance, irrespective of transmission intensity in the source region. As a control, we first confirmed that including source-region case intensity as an additive covariate (log of reported cases in the nearest invaded region) did not resolve the departure: the primary model, which already contains this term, retains non-proportionality for distance (p = 0.037) and pressure (p = 0.017), establishing that the departure is specific to the structural form of distance-exposure aggregation within the kernel rather than to the presence of case-intensity information. We then constructed two alternative kernels in which source-region contributions were weighted by an index of local transmission intensity, by and by observed in each source region in the preceding year, and refitted the primary model substituting each weighted kernel for the unweighted (Supplementary Table S8). Both weighted formulations resolved the departures in the diffusion metrics (distance p = 0.509 and 0.591; pressure p = 0.159 and 0.365, for the - and kernels respectively), but neither eliminated the global departure (p = 0.013 and 0.023). In both weighted models the residual global departure localised to precipitation, whose non-proportionality was essentially unchanged by the re-weighting (p = 0.013 and 0.017), whereas the Urbanization departure seen in the primary model did not persist under re-specification (p = 0.161 and 0.152); precipitation is therefore the principal, but not the sole, residual source. Critically, both weighted kernels produced substantially poorer fit than the unweighted kernel by AIC (ΔAIC = 21.3 and 24.1) at essentially unchanged concordance (0.873 versus 0.875), and yielded attenuated pressure effect sizes (HR 1.09–1.11 versus 1.26). The unweighted is therefore retained as the primary invasion-pressure metric on the basis of its superior fit, with the weighted kernels reported as complementary sensitivity analyses characterising the structural assumptions of the kernel.

The two weighted metrics were strongly correlated with the unweighted Φ (r = 0.72 and 0.71 for the log(cases + 1)- and √cases-weighted kernels, respectively), indicating that they largely capture the same spatial-exposure structure and differ mainly in up-weighting source regions with higher recent incidence; their poorer fit therefore reflects that this case-intensity re-weighting adds noise rather than signal relative to the geographic density of surrounding invaded regions.

**Phase-stratified assessment.**

To determine whether the departure arose from differences in baseline hazard across the successive phases of the epidemic rather than from effect-level time dependence, the primary model was refitted with the baseline hazard stratified by invasion phase. The covariate hazard ratios were essentially unchanged from the primary model (distance 0.56, 95% CI 0.50–0.62; pressure 1.26, 95% CI 1.17–1.35, on average across the study period; Supplementary Table S9), indicating that the covariate effects are stable across phases and that the departure reflects effect-level time dependence rather than phase-specific differences in baseline hazard.

**Precipitation non-proportionality sensitivity.**

Because precipitation was the principal residual violator, we refitted the primary model allowing its coefficient to vary over follow-up time The precipitation time-interaction was significant (HR 0.78, 95% CI 0.61–1.00, p = 0.047), consistent with its residual non-proportionality, but the distance, pressure, temperature, and humidity hazard ratios were unchanged from the primary model (Supplementary Table S10). The residual non-proportionality attributable to precipitation, an adjustment covariate, therefore does not affect the interpreted eco-climatic or diffusion effects.

**Supplementary Figures**

**Note:** Supplementary Figures S1–S9 are embedded in this document. Figure S1 represents the overall conceptual framework (illustrative) of this study. Figure S2 shows the profile-likelihood curve for the spatial decay parameter λ, along with the AIC and Concordance. Figure S3 shows the stability of primary hazard ratio estimates across leave-one-country-out sensitivity analysis. Figure S4 shows scaled Schoenfeld residual plots for geographic distance and neighbourhood invasion pressure. Figure S5 shows the distribution of geographic annual mean temperature stratified by neighbourhood pressure quintile. Figure S6 shows the distribution of the distance between each newly invaded NUTS3 region and its nearest previously invaded neighbour at the time of first emergence, stratified by invasion phase: Early (2006–2010), Middle (2011–2015), Pre-COVID (2016–2019), and Post-COVID (2020–2024). Figure S7 shows **Urbanization composition of first-invaded regions compared with the at-risk regional background. Figure S8 shows Urbanization composition of first-invaded regions by invasion phase. Figure S9 shows. Phase-specific first-invasion rate by Urbanization category.**

***Figure S1. Overview of the analytical framework used to quantify the invasion risk of West Nile virus (WNV) across European NUTS3 regions (2006–2024).*** *The workflow integrates WNV occurrence records, climatic covariates from ERA5, urbanization data from Eurostat, and geographic distances derived from NUTS3 boundary shapefiles. Spatial diffusion covariates were constructed as (i) distance to the nearest previously invaded region and (ii) neighbourhood invasion pressure, calculated using a spatial-decay kernel that weights the influence of all previously invaded regions according to geographic distance. Time-varying climatic and urbanization covariates were linked to annual observations and organized in a start–stop survival framework. Associations between covariates and first WNV invasion were evaluated using Cox proportional hazards models, Kaplan–Meier analyses, and interaction analyses. Model performance was assessed using Akaike’s Information Criterion (AIC) and concordance statistics, while robustness was evaluated through sensitivity analyses including alternative spatial-decay parameters and kernels, shared frailty models, climate anomaly models, and leave-one-country-out analyses. Note : The figure is illustrative only.*

***Supplementary Figure S2:******Sensitivity of the invasion pressure metric to the spatial-decay parameter (λ).*** *(A) Hazard ratios (HRs) and 95% confidence intervals for neighbourhood invasion pressure estimated from multivariable Cox models across alternative decay distances. (B) Model fit assessed using Akaike’s Information Criterion (AIC). Lower values indicate better fit. (C) Model discrimination assessed using Harrell’s concordance statistic. Across all tested decay distances, invasion pressure remained positively associated with invasion risk, while model fit and predictive performance remained stable, indicating that the results are robust to the specification of the spatial decay parameter.*

***Supplementary Figure S3****. Stability of primary hazard ratio estimates across leave-one-country-out analyses. Each point represents the hazard ratio estimated from the primary multivariable Cox proportional hazards model after sequentially excluding one of the 18 countries contributing to the dataset. Three key predictors are shown: geographic distance to the nearest previously invaded region (purple), neighbourhood invasion pressure ( teal), and annual mean temperature (orange). Vertical dashed lines indicate the primary full-dataset estimate for each predictor. The tight clustering of country-specific estimates around the primary values confirms that no single country's epidemic, surveillance system, or geographic distribution of NUTS3 regions disproportionately influenced the main findings.*

***Supplementary Figure S4.*** *Scaled Schoenfeld residual plots for the proportional hazards assumption diagnostic. (A) Geographic distance to the nearest previously invaded region (distance100). (B) Neighbourhood invasion pressure (pressure_z). In each panel, points represent scaled Schoenfeld residuals for individual first-invasion events plotted against event time (years since 2006); the smooth line (LOESS fit) and shaded 95% confidence band indicate the estimated time-varying pattern of the covariate's coefficient. Departure of the smooth line from a horizontal trajectory indicates non-proportionality. Both covariates show a systematic temporal trend, confirming a genuine, modest departure from the proportional hazards assumption (see Supplementary Methods S1).*

***Supplementary Figure S5.*** *Distribution of annual mean temperatures at the time of first human WNV emergence, stratified by quintile of neighbourhood invasion pressure (Φ) at the focal region in the year of invasion (Very low, Low, Moderate, High, Very high; n = 53–54 per category). Violin shapes show the full density distribution of temperatures within each pressure category; internal boxplots indicate medians and interquartile ranges; individual points represent observed first invasion events. Temperature differed significantly across pressure categories (Kruskal–Wallis χ² = 43.1, df = 4, p = 9.9 × 10⁻⁹). Pairwise post-hoc comparisons (Wilcoxon rank-sum tests, Benjamini–Hochberg adjusted) showed that the Very Low category differed significantly from all four higher categories (all adjusted p < 2.1 × 10⁻⁵), whereas the Low, Moderate, High, and Very High categories were largely statistically indistinguishable (all pairwise adjusted p > 0.07, with the exception of Low vs. Very High, adjusted p = 0.021). This pattern indicates that elevated temperature at first invasion is associated with the presence of any meaningful neighbourhood invasion pressure, rather than increasing progressively across higher pressure levels — a step-like relationship that contrasts with the more continuous temperature gradient observed across categories of geographic distance to the nearest invaded region (Figure 4A, main text).*

***Supplementary Figure S6.*** *Distribution of the distance between each newly invaded NUTS3 region and its nearest previously invaded neighbour at the time of first emergence, stratified by invasion phase: Early (2006–2010), Middle (2011–2015), Pre-COVID (2016–2019), and Post-COVID (2020–2024). Violin shapes show the full density distribution of distances within each phase, plotted on a log scale to accommodate the right-skewed distribution; internal boxplots indicate medians and interquartile ranges; individual points represent observed first invasion events. Distance differed significantly across invasion phases overall (Kruskal–Wallis χ² = 25.1, df = 3, p = 1.5 × 10⁻⁵). Pairwise post-hoc comparisons (Wilcoxon rank-sum tests, Benjamini–Hochberg adjusted) showed that the Early phase differed significantly from all three subsequent phases (Early vs. Middle, adjusted p = 7.1 × 10⁻⁴; Early vs. Pre-COVID, adjusted p = 9.2 × 10⁻⁶; Early vs. Post-COVID, adjusted p = 1.8 × 10⁻⁴), whereas the Middle, Pre-COVID, and Post-COVID phases were statistically indistinguishable (all pairwise adjusted p > 0.16). Invasions during the Early phase occurred at consistently greater distances from existing foci — reflecting the sparse invasion landscape of this period when few source regions existed — after which typical invasion distances stabilised at shorter and consistent ranges as the endemic belt consolidated across southeastern and central Europe.*

***Supplementary Figure S7. Urbanization composition of first-invaded regions compared with the at-risk regional background.*** *Percentage of regions in each Eurostat degree-of-Urbanization category (urban, intermediate, rural) among first-invaded regions (red; n = 269) and among all at-risk regions in the study area (grey; n = 1,011). Bars show the percentage within each group; counts (n) are indicated above each bar. First-invaded regions are those recording their first documented human WNV outbreak during the study period; the at-risk background comprises all regions contributing region-years to the analysis. The two distributions did not differ (χ² test of independence between Urbanization category and invasion status, p = 0.52), indicating that the position of the invasion front is not structured by degree of Urbanization. This descriptive result is consistent with the non-significant Urbanization hazard ratios in the primary multivariable model (Fig. 3A).*

***Supplementary Figure S8.******Urbanization composition of first-invaded regions by invasion phase.*** *Percentage of first-invaded regions in each Eurostat degree-of-Urbanization category (urban, intermediate, rural) within each invasion phase (Early, 2006–2010; Middle, 2011–2015; Pre-COVID, 2016–2019; Post-COVID, 2020–2024). Counts (n) are shown within bars and the phase total above each bar. The composition differed across phases (χ² test of independence, p = 0.007), reflecting a shift toward urban regions in the 2020–2024 period. Because this compositional measure does not account for the changing at-risk regional pool, the phase-specific rate analysis (Supplementary Figure S9) is required for interpretation.*

***Supplementary Figure S9.******Phase-specific first-invasion rate by Urbanization category.*** *First-invasion rate (per 1,000 at-risk region-years; log scale; points with exact Poisson 95% confidence intervals) for urban, intermediate, and rural regions across invasion phases. Using at-risk region-years as the denominator accounts for depletion of the susceptible pool as regions are invaded, so this analysis, unlike the composition in Supplementary Figure S8, is not confounded by pool depletion. The Urbanization-specific rate varied across phases (Urbanization × phase interaction, Poisson likelihood-ratio test, p = 0.006), an effect driven by the 2020–2024 period: the interaction was not significant when this period was excluded (p = 0.54), indicating that Urbanization-specific rates were stable from 2007 to 2019. This recent shift coincides with pandemic-related changes in WNV surveillance and cannot be attributed to transmission ecology with these data (see Discussion).*

# Supplementary Tables

**Supplementary Table S1.** Sensitivity of the neighbourhood invasion pressure hazard ratio to the spatial decay parameter λ. Cox proportional hazards models were fitted iteratively using λ values from 25 to 500 km; all models included geographic distance, invasion pressure, annual mean temperature, precipitation, relative humidity, and Urbanization category as covariates. HR: hazard ratio for a one standard-deviation increase in neighbourhood invasion pressure; CIs: 95% confidence intervals. The optimal λ minimising the AIC was 50 km, selected for the primary analysis. Invasion pressure remained a significant positive predictor of first WNV emergence across all tested decay scales.

| **λ (km)** | **HR (95% CI)** | **p-value** | **AIC** | **Concordance** |
| --- | --- | --- | --- | --- |
| 25 | 1.16 (1.10-1.22) | 1.77 × 10⁻⁸ | 3,110.03 | 0.87 |
| **50** | **1.26 (1.17-1.35)** | **5.78 × 10⁻¹¹** | **3,099.66** | **0.88** |
| 75 | 1.30 (1.19-1.42) | 4.17 × 10⁻¹⁰ | 3,100.83 | 0.87 |
| 100 | 1.33 (1.20-1.47) | 1.10 × 10⁻⁸ | 3,104.69 | 0.87 |
| 150 | 1.33 (1.17-1.52) | 5.00 × 10⁻⁶ | 3,113.05 | 0.87 |
| 200 | 1.31 (1.13-1.51) | 2.36 × 10⁻⁴ | 3,118.95 | 0.87 |
| 250 | 1.28 (1.09-1.50) | 2.03 × 10⁻³ | 3,122.41 | 0.87 |
| 500 | 1.23 (1.02-1.49) | 4.07 × 10⁻² | 3,127.16 | 0.87 |

**Supplementary Table S2.** Sensitivity of the neighbourhood invasion pressure hazard ratio to the mathematical specification of the distance-decay connectivity kernel. Three kernel formulations were evaluated: exponential (primary), Gaussian, and inverse-distance. All models used the optimal decay scale (λ = 50 km) and included the same covariate set as the primary analysis. HR: hazard ratio for a one standard-deviation increase in neighbourhood invasion pressure. All three kernel specifications produced qualitatively similar conclusions, confirming that the neighbourhood effect was not sensitive to the mathematical form of spatial connectivity assumed.

| **Kernel** | **HR (95% CI)** | **p-value** | **AIC** | **Concordance** |
| --- | --- | --- | --- | --- |
| **Exponential** | **1.26 (1.17–1.35)** | **<0.001** | **3,099.7** | **0.875** |
| Gaussian | 1.21 (1.14–1.29) | <0.001 | 3,101.4 | 0.875 |
| Inverse-distance | 1.53 (1.25–1.88) | <0.001 | 3,114.8 | 0.870 |

**Supplementary Table S3.** Results from the shared-frailty Cox proportional hazards model incorporating country-level gamma-distributed random effects to account for unobserved between-country heterogeneity in WNV surveillance intensity and ecological conditions. HR: hazard ratio; CI: confidence interval. The frailty variance estimate of 0.54 indicates significant between-country heterogeneity (likelihood-ratio test p < 0.001), consistent with variation in national surveillance systems. Despite this heterogeneity, the direction, magnitude, and significance of the primary spatial diffusion and climatic covariate effects were preserved relative to the primary model without frailty, confirming that observed diffusion patterns were not driven by unmeasured country-specific factors.

| **Covariate** | **HR (95% CI)** | **p-value** |
| --- | --- | --- |
| Distance (per 100 km) | 0.62 (0.56–0.69) | <0.001 |
| Invasion pressure (per SD) | 1.20 (1.11–1.30) | <0.001 |
| Source-region intensity (log cases) | 1.40 (1.19–1.65) | <0.001 |
| Temperature (per °C) | 1.17 (1.08–1.27) | <0.001 |
| Relative humidity (per %) | 0.94 (0.90–0.98) | 0.004 |
| Precipitation (per SD) | 0.97 (0.81–1.15) | 0.692 |
| Urbanization: intermediate (vs urban) | 0.84 (0.61–1.18) | 0.317 |
| Urbanization: rural (vs urban) | 0.67 (0.46–1.00) | 0.048 |
| **Frailty variance (between-country)** | **0.54** | — |

*Concordance = 0.892 (SE = 0.01). Model includes all covariates from the primary analysis.*

**Supplementary Table S4.** Sensitivity analysis using region-specific annual climatic anomalies (deviations from long-term regional means) in place of absolute climatic values. The absolute climatic value primary model (AIC = 3099.66) substantially outperformed the anomaly-based model (AIC = 3193.51, ΔAIC = 93.85), indicating that long-term climatic suitability rather than short-term departures from local norms governs regional permissiveness to WNV invasion. HR: hazard ratio; CI: confidence interval. Anomalies were calculated as the deviation of each annual observation from the region-specific 2000–2006 mean.

| **Covariate** | **HR (95% CI)** | **p-value** |
| --- | --- | --- |
| Distance (per 100 km) | 0.57 (0.52–0.64) | <0.001 |
| Invasion pressure (per SD) | 1.18 (1.09–1.27) | <0.001 |
| Source-region intensity (log cases) | 1.48 (1.27–1.74) | <0.001 |
| Temperature anomaly (per °C) | 2.77 (2.00–3.84) | <0.001 |
| Humidity anomaly (per °C) | 1.16 (1.07–1.26) | <0.001 |
| Precipitation anomaly (per SD) | 0.95 (0.82–1.10) | 0.524 |
| Urbanization: intermediate (vs urban) | 0.63 (0.46–0.86) | 0.004 |
| Urbanization: rural (vs urban) | 0.55 (0.39–0.76) | <0.001 |

**Supplementary Table S5.** Leave-one-country-out sensitivity analysis. The primary multivariable Cox proportional hazards model was refitted 18 times, sequentially excluding each of the 18 countries contributing to the dataset. Hazard ratios for geographic distance, neighbourhood invasion pressure, and annual mean temperature are shown for each exclusion. Results were highly stable across all 18 exclusions, confirming that no single country's epidemic, surveillance system, or spatial distribution of NUTS3 regions disproportionately influenced the primary findings.

| **Country excluded** | **Distance HR (95% CI)** | **Pressure HR (95% CI)** | **Temperature HR (95% CI)** |
| --- | --- | --- | --- |
| Austria (AT) | 0.56 (0.50–0.62) | 1.26 (1.17–1.35) | 1.24 (1.18–1.30) |
| Bulgaria (BG) | 0.54 (0.49–0.60) | 1.26 (1.17–1.35) | 1.25 (1.19–1.32) |
| Cyprus (CY) | 0.55 (0.50–0.61) | 1.25 (1.16–1.35) | 1.25 (1.19–1.31) |
| Czechia (CZ) | 0.56 (0.51–0.62) | 1.25 (1.16–1.35) | 1.25 (1.18–1.31) |
| Germany (DE) | 0.60 (0.54–0.67) | 1.23 (1.13–1.35) | 1.22 (1.15–1.28) |
| Greece (EL) | 0.53 (0.47–0.60) | 1.27 (1.18–1.37) | 1.25 (1.17–1.33) |
| Spain (ES) | 0.53 (0.48–0.59) | 1.23 (1.14–1.33) | 1.25 (1.19–1.32) |
| France (FR) | 0.56 (0.50–0.62) | 1.27 (1.18–1.37) | 1.24 (1.18–1.31) |
| Croatia (HR) | 0.56 (0.50–0.61) | 1.25 (1.16–1.34) | 1.25 (1.19–1.32) |
| Hungary (HU) | 0.58 (0.52–0.64) | 1.26 (1.17–1.36) | 1.26 (1.20–1.33) |
| Italy (IT) | 0.56 (0.50–0.62) | 1.27 (1.16–1.40) | 1.26 (1.19–1.33) |
| North Macedonia (MK) | 0.55 (0.50–0.61) | 1.25 (1.16–1.35) | 1.24 (1.17–1.30) |
| Netherlands (NL) | 0.55 (0.50–0.61) | 1.25 (1.16–1.35) | 1.25 (1.19–1.31) |
| Portugal (PT) | 0.56 (0.51–0.62) | 1.26 (1.17–1.35) | 1.25 (1.19–1.31) |
| Romania (RO) | 0.58 (0.52–0.65) | 1.26 (1.17–1.36) | 1.30 (1.23–1.37) |
| Slovenia (SI) | 0.56 (0.50–0.62) | 1.26 (1.17–1.35) | 1.26 (1.19–1.32) |
| Slovakia (SK) | 0.55 (0.50–0.61) | 1.25 (1.16–1.34) | 1.25 (1.18–1.31) |
| Türkiye (TR) | 0.58 (0.52–0.64) | 1.28 (1.18–1.38) | 1.24 (1.18–1.31) |
| ALL (primary) | 0.56 (0.50–0.62) | 1.26 (1.17–1.35) | 1.25 (1.19–1.31) |

**Supplementary Table S6. Scaled Schoenfeld proportional-hazards test for the primary multivariable model.**

| **Covariate** | **χ²** | **df** | **p-value** |
| --- | --- | --- | --- |
| Distance (per 100 km) | 4.35 | 1 | 0.037 |
| Invasion pressure (per SD) | 5.69 | 1 | 0.017 |
| Source-region intensity (log cases) | 0.07 | 1 | 0.792 |
| Temperature (per °C) | 0.19 | 1 | 0.667 |
| Relative humidity (per %) | 1.44 | 1 | 0.231 |
| Precipitation (per SD) | 6.11 | 1 | 0.013 |
| Urbanization | 6.28 | 2 | 0.043 |
| GLOBAL | 25.77 | 8 | 0.001 |

**Supplementary Table S7.** Time-varying coefficient Cox proportional hazards model for spatial diffusion metrics. Each spatial diffusion metric was extended with a logarithmic time-interaction term to allow its association with invasion hazard to evolve smoothly across the study period. The baseline effect represents the estimated hazard ratio at (start of follow-up); the interaction term coefficient indicates whether the covariate's effect strengthens (positive) or weakens (negative) as follow-up time increases.

| **Term** | **HR (95% CI)** | **p-value** |
| --- | --- | --- |
| Distance (per 100 km) | 0.41 (0.27–0.62) | <0.001 |
| Distance × log(t + 1) | 1.18 (0.98–1.42) | 0.080 |
| Invasion pressure (per SD) | 1.88 (1.02–3.43) | 0.041 |
| Invasion pressure × log(t + 1) | 0.88 (0.71–1.09) | 0.231 |
| Source-region intensity (log cases) | 1.36 (1.16–1.59) | <0.001 |
| Temperature (per °C) | 1.27 (1.20–1.33) | <0.001 |
| Relative humidity (per %) | 0.97 (0.94–1.00) | 0.034 |
| Precipitation (per SD) | 1.00 (0.87–1.15) | 0.991 |
| Urbanization: intermediate (vs urban) | 0.89 (0.65–1.22) | 0.481 |
| Urbanization: rural (vs urban) | 0.84 (0.60–1.18) | 0.322 |

*Study-entry (t = 0) hazard ratios; concordance = 0.878. A significant time interaction indicates a hazard ratio that changes over follow-up.*

**Supplementary Table S8.** Comparison of proportional hazards diagnostics and model fit across primary and alternative case-weighted invasion pressure kernel specifications. Two alternative kernel formulations weighted source-region contributions by local transmission intensity (log[cases + 1] and √cases in the preceding year) and were compared against the primary unweighted kernel. A critical control analysis confirmed that adding source-region case intensity as a plain additive covariate alongside the unweighted kernel did not resolve the violation (the primary model already includes this covariate; unweighted row), indicating that the improvement is specific to integrating case-weighting into the kernel's distance-aggregation structure rather than simply having case-intensity information present in the model. ΔAIC calculated relative to the primary unweighted kernel (AIC = 3099.7).

| **Kernel** | **Distance** | **Pressure** | **Precipitation** | **Urbanization** | **Global** | **AIC** | **C-index** | **Pressure HR** |
| --- | --- | --- | --- | --- | --- | --- | --- | --- |
|  | p-value | | | | |  |  |  |
| Unweighted (primary) | 0.037 | 0.017 | 0.013 | 0.043 | 0.001 | 3099.7 | 0.875 | 1.26 |
| Log(cases + 1)-weighted | 0.509 | 0.159 | 0.013 | 0.161 | 0.013 | 3121.0 | 0.873 | 1.11 |
| √cases-weighted | 0.591 | 0.365 | 0.017 | 0.152 | 0.023 | 3123.8 | 0.873 | 1.09 |

*Proportional-hazards properties and model fit of case-weighted invasion-pressure kernels. ΔAIC relative to the unweighted primary model: 21.3 (log-weighted) and 24.1 (√cases-weighted).*

**Supplementary Table S9. Multivariable model with baseline hazard stratified by invasion phase.**

| **Term** | **HR (95% CI)** | **p-value** |
| --- | --- | --- |
| Distance (per 100 km) | 0.56 (0.50–0.62) | <0.001 |
| Invasion pressure (per SD) | 1.26 (1.17–1.35) | <0.001 |
| Source-region intensity (log cases) | 1.38 (1.18–1.62) | <0.001 |
| Temperature (per °C) | 1.25 (1.19–1.31) | <0.001 |
| Relative humidity (per %) | 0.96 (0.93–0.99) | 0.014 |
| Precipitation (per SD) | 0.99 (0.85–1.14) | 0.836 |
| Urbanization: intermediate (vs urban) | 0.86 (0.63–1.17) | 0.337 |
| Urbanization: rural (vs urban) | 0.83 (0.59–1.16) | 0.276 |

**Supplementary Table S10. Interpreted effects with precipitation allowed to vary over follow-up time.**

| **Term** | **Primary HR (95% CI)** | **Precipitation time-varying HR (95% CI)** |
| --- | --- | --- |
| Distance (per 100 km) | 0.56 (0.50–0.62) | 0.55 (0.50–0.61) |
| Invasion pressure (per SD) | 1.26 (1.17–1.35) | 1.27 (1.18–1.36) |
| Temperature (per °C) | 1.25 (1.19–1.31) | 1.25 (1.18–1.31) |
| Relative humidity (per %) | 0.96 (0.93–0.99) | 0.96 (0.93–0.99) |

*Precipitation × log(t + 1): HR 0.78 (95% CI 0.61–1.00), p = 0.047.*
